# Supplementary material for: Draft genome of the reindeer (Rangifer tarandus)
Source: PubMed Central journal article supplement (PMC5726476; doi:10.1093/gigascience/gix102), 2017-11-01

# GigaScience

## Draft genome of the Reindeer (*Rangifer tarandus*)

--Manuscript Draft--

|                                                      |                                                                                                                                                                                                                                                                                                                                                                                                                                                                                                                                                                                                                                                                                                                                                                                                                                                                                                                                                                                                                                                                                                                                                                                                                                                                                                                                                                                                                                                                                                                                                                     |              |
|------------------------------------------------------|---------------------------------------------------------------------------------------------------------------------------------------------------------------------------------------------------------------------------------------------------------------------------------------------------------------------------------------------------------------------------------------------------------------------------------------------------------------------------------------------------------------------------------------------------------------------------------------------------------------------------------------------------------------------------------------------------------------------------------------------------------------------------------------------------------------------------------------------------------------------------------------------------------------------------------------------------------------------------------------------------------------------------------------------------------------------------------------------------------------------------------------------------------------------------------------------------------------------------------------------------------------------------------------------------------------------------------------------------------------------------------------------------------------------------------------------------------------------------------------------------------------------------------------------------------------------|--------------|
| <b>Manuscript Number:</b>                            | GIGA-D-17-00152                                                                                                                                                                                                                                                                                                                                                                                                                                                                                                                                                                                                                                                                                                                                                                                                                                                                                                                                                                                                                                                                                                                                                                                                                                                                                                                                                                                                                                                                                                                                                     |              |
| <b>Full Title:</b>                                   | Draft genome of the Reindeer ( <i>Rangifer tarandus</i> )                                                                                                                                                                                                                                                                                                                                                                                                                                                                                                                                                                                                                                                                                                                                                                                                                                                                                                                                                                                                                                                                                                                                                                                                                                                                                                                                                                                                                                                                                                           |              |
| <b>Article Type:</b>                                 | Data Note                                                                                                                                                                                                                                                                                                                                                                                                                                                                                                                                                                                                                                                                                                                                                                                                                                                                                                                                                                                                                                                                                                                                                                                                                                                                                                                                                                                                                                                                                                                                                           |              |
| <b>Funding Information:</b>                          | National Natural Science Foundation of China (31501984)                                                                                                                                                                                                                                                                                                                                                                                                                                                                                                                                                                                                                                                                                                                                                                                                                                                                                                                                                                                                                                                                                                                                                                                                                                                                                                                                                                                                                                                                                                             | Dr Wen Wang  |
|                                                      | Central Public-interest Scientific Institution Basal Research Fund (1610342016026)                                                                                                                                                                                                                                                                                                                                                                                                                                                                                                                                                                                                                                                                                                                                                                                                                                                                                                                                                                                                                                                                                                                                                                                                                                                                                                                                                                                                                                                                                  | Dr Wen Wang  |
|                                                      | Talents Team Construction Fund of Northwestern Polytechnical University                                                                                                                                                                                                                                                                                                                                                                                                                                                                                                                                                                                                                                                                                                                                                                                                                                                                                                                                                                                                                                                                                                                                                                                                                                                                                                                                                                                                                                                                                             | Dr Qiang Qiu |
| <b>Abstract:</b>                                     | <p>Background: Reindeer (<i>Rangifer tarandus</i>) is the only fully domesticated species in the Cervidae family, and is the only cervid with a circumpolar distribution. Unlike all other cervids, female reindeer regularly grow cranial appendages (antlers, the defining characteristics of cervids), as well as males. Moreover, reindeer milk contains more protein and less lactose than bovid milk. A high quality reference genome of this species will assist efforts to elucidate these and other important features in the reindeer. Findings: We obtained 723.2 Gb (Gigabase) of raw reads by an Illumina HiSeq 4000 platform, and a 2.64 Gb final assembly, representing 95.7% of the estimated genome (2.76 Gb according to k-mer analysis), including 92.6% of expected genes according to BUSCO analysis. The contig N50 and scaffold N50 sizes were 89.7 kilo base (kb) and 0.94 mega base (Mb), respectively. We annotated 21,555 protein-coding genes and 1.07 Gb of repetitive sequences by de novo and homology-based prediction. Homology-based searches detected 159 rRNA, 547 miRNA, 1,339 snRNA and 863 tRNA sequences in the genome of <i>R. tarandus</i>. The divergence time between <i>R. tarandus</i>, and ancestors of <i>Bos taurus</i> and <i>Capra hircus</i>, is estimated to be 29.55 million years ago (Mya). Conclusions: Our results provide the first high-quality reference genome for the reindeer, and a valuable resource for studying evolution, domestication and other unusual characteristics of the reindeer.</p> |              |
| <b>Corresponding Author:</b>                         | Wen Wang                                                                                                                                                                                                                                                                                                                                                                                                                                                                                                                                                                                                                                                                                                                                                                                                                                                                                                                                                                                                                                                                                                                                                                                                                                                                                                                                                                                                                                                                                                                                                            |              |
| <b>Corresponding Author Secondary Information:</b>   |                                                                                                                                                                                                                                                                                                                                                                                                                                                                                                                                                                                                                                                                                                                                                                                                                                                                                                                                                                                                                                                                                                                                                                                                                                                                                                                                                                                                                                                                                                                                                                     |              |
| <b>Corresponding Author's Institution:</b>           |                                                                                                                                                                                                                                                                                                                                                                                                                                                                                                                                                                                                                                                                                                                                                                                                                                                                                                                                                                                                                                                                                                                                                                                                                                                                                                                                                                                                                                                                                                                                                                     |              |
| <b>Corresponding Author's Secondary Institution:</b> |                                                                                                                                                                                                                                                                                                                                                                                                                                                                                                                                                                                                                                                                                                                                                                                                                                                                                                                                                                                                                                                                                                                                                                                                                                                                                                                                                                                                                                                                                                                                                                     |              |
| <b>First Author:</b>                                 | Zhipeng Li                                                                                                                                                                                                                                                                                                                                                                                                                                                                                                                                                                                                                                                                                                                                                                                                                                                                                                                                                                                                                                                                                                                                                                                                                                                                                                                                                                                                                                                                                                                                                          |              |
| <b>First Author Secondary Information:</b>           |                                                                                                                                                                                                                                                                                                                                                                                                                                                                                                                                                                                                                                                                                                                                                                                                                                                                                                                                                                                                                                                                                                                                                                                                                                                                                                                                                                                                                                                                                                                                                                     |              |
| <b>Order of Authors:</b>                             | Zhipeng Li                                                                                                                                                                                                                                                                                                                                                                                                                                                                                                                                                                                                                                                                                                                                                                                                                                                                                                                                                                                                                                                                                                                                                                                                                                                                                                                                                                                                                                                                                                                                                          |              |
|                                                      | Zeshan Lin                                                                                                                                                                                                                                                                                                                                                                                                                                                                                                                                                                                                                                                                                                                                                                                                                                                                                                                                                                                                                                                                                                                                                                                                                                                                                                                                                                                                                                                                                                                                                          |              |
|                                                      | Lei Chen                                                                                                                                                                                                                                                                                                                                                                                                                                                                                                                                                                                                                                                                                                                                                                                                                                                                                                                                                                                                                                                                                                                                                                                                                                                                                                                                                                                                                                                                                                                                                            |              |
|                                                      | Hengxing Ba                                                                                                                                                                                                                                                                                                                                                                                                                                                                                                                                                                                                                                                                                                                                                                                                                                                                                                                                                                                                                                                                                                                                                                                                                                                                                                                                                                                                                                                                                                                                                         |              |
|                                                      | Yongzhi Yang                                                                                                                                                                                                                                                                                                                                                                                                                                                                                                                                                                                                                                                                                                                                                                                                                                                                                                                                                                                                                                                                                                                                                                                                                                                                                                                                                                                                                                                                                                                                                        |              |
|                                                      | Kun Wang                                                                                                                                                                                                                                                                                                                                                                                                                                                                                                                                                                                                                                                                                                                                                                                                                                                                                                                                                                                                                                                                                                                                                                                                                                                                                                                                                                                                                                                                                                                                                            |              |
|                                                      | Qiang Qiu                                                                                                                                                                                                                                                                                                                                                                                                                                                                                                                                                                                                                                                                                                                                                                                                                                                                                                                                                                                                                                                                                                                                                                                                                                                                                                                                                                                                                                                                                                                                                           |              |
|                                                      | Guangyu Li                                                                                                                                                                                                                                                                                                                                                                                                                                                                                                                                                                                                                                                                                                                                                                                                                                                                                                                                                                                                                                                                                                                                                                                                                                                                                                                                                                                                                                                                                                                                                          |              |
| Wen Wang                                             |                                                                                                                                                                                                                                                                                                                                                                                                                                                                                                                                                                                                                                                                                                                                                                                                                                                                                                                                                                                                                                                                                                                                                                                                                                                                                                                                                                                                                                                                                                                                                                     |              |

|                                                                                                                                                                                                                                                                                                                                                                                                                                                                                                                               |                                                                      |
|-------------------------------------------------------------------------------------------------------------------------------------------------------------------------------------------------------------------------------------------------------------------------------------------------------------------------------------------------------------------------------------------------------------------------------------------------------------------------------------------------------------------------------|----------------------------------------------------------------------|
| <b>Order of Authors Secondary Information:</b>                                                                                                                                                                                                                                                                                                                                                                                                                                                                                |                                                                      |
| <b>Opposed Reviewers:</b>                                                                                                                                                                                                                                                                                                                                                                                                                                                                                                     | Glenn Yannic, PhD<br>Associate Professor<br>glenn.yannic@univ-smb.fr |
|                                                                                                                                                                                                                                                                                                                                                                                                                                                                                                                               | Steeve Cote, Dr<br>Steeve.Cote@bio.ulaval.ca                         |
|                                                                                                                                                                                                                                                                                                                                                                                                                                                                                                                               | Louis Bernatchez<br>louis.bernatchez@bio.ulaval.ca                   |
|                                                                                                                                                                                                                                                                                                                                                                                                                                                                                                                               | Knut Roed<br>knut.roed@nmbu.no                                       |
|                                                                                                                                                                                                                                                                                                                                                                                                                                                                                                                               | Juha Kantanen, Prof<br>juha.kantanen@luke.fi                         |
| <b>Additional Information:</b>                                                                                                                                                                                                                                                                                                                                                                                                                                                                                                |                                                                      |
| <b>Question</b>                                                                                                                                                                                                                                                                                                                                                                                                                                                                                                               | <b>Response</b>                                                      |
| Are you submitting this manuscript to a special series or article collection?                                                                                                                                                                                                                                                                                                                                                                                                                                                 | No                                                                   |
| <b>Experimental design and statistics</b><br><br>Full details of the experimental design and statistical methods used should be given in the Methods section, as detailed in our <a href="#">Minimum Standards Reporting Checklist</a> . Information essential to interpreting the data presented should be made available in the figure legends.<br><br>Have you included all the information requested in your manuscript?                                                                                                  | Yes                                                                  |
| <b>Resources</b><br><br>A description of all resources used, including antibodies, cell lines, animals and software tools, with enough information to allow them to be uniquely identified, should be included in the Methods section. Authors are strongly encouraged to cite <a href="#">Research Resource Identifiers</a> (RRIDs) for antibodies, model organisms and tools, where possible.<br><br>Have you included the information requested as detailed in our <a href="#">Minimum Standards Reporting Checklist</a> ? | Yes                                                                  |
| <b>Availability of data and materials</b><br><br>All datasets and code on which the conclusions of the paper rely must be either included in your submission or                                                                                                                                                                                                                                                                                                                                                               | Yes                                                                  |

deposited in [publicly available repositories](#) (where available and ethically appropriate), referencing such data using a unique identifier in the references and in the “Availability of Data and Materials” section of your manuscript.

Have you have met the above requirement as detailed in our [Minimum Standards Reporting Checklist](#)?

1  
2  
3  
4  
5  
6  
7  
8  
9  
10  
11  
12  
13  
14  
15  
16  
17  
18  
19  
20  
21  
22  
23  
24  
25  
26  
27  
28  
29  
30  
31  
32  
33  
34  
35  
36  
37  
38  
39  
40  
41  
42  
43  
44  
45  
46  
47  
48  
49  
50  
51  
52  
53  
54  
55  
56  
57  
58  
59  
60  
61  
62  
63  
64  
65

1                      **Draft genome of the Reindeer (*Rangifer tarandus*)**

2     **Zhipeng Li<sup>1\*</sup>, Zeshan Lin<sup>2\*</sup>, Lei Chen<sup>2\*</sup>, Hengxing Ba<sup>1\*</sup>, Yongzhi Yang<sup>2</sup>, Kun**

3     **Wang<sup>2</sup>, Wen Wang<sup>2#</sup>, Qiu Qiang<sup>2#</sup>, Guangyu Li<sup>1#</sup>**

4     <sup>1</sup> Jilin Provincial Key Laboratory for Molecular Biology of Special Economic

5     Animals, Institute of Special Animal and Plant Sciences, Chinese Academy of

6     Agricultural Sciences, Changchun, 130112, China

7     <sup>2</sup> Center for Ecological and Environmental Sciences, Northwestern Polytechnical

8     University, Xi'an 710072, China

9     \* These authors contributed equally to this work.

10    # Corresponding authors: tcsly@126.com (GL), qiuqiang@lzu.edu.cn (QQ),

11    wwang@wangwen-lab.org or wwang@mail.kiz.ac.cn (WW)

1  
2  
3  
4  
5 13 **Abstract**  
6

7 14 **Background:** Reindeer (*Rangifer tarandus*) is the only fully domesticated species in  
8  
9  
10 15 the Cervidae family, and is the only cervid with a circumpolar distribution. Unlike all  
11  
12 16 other cervids, female reindeer regularly grow cranial appendages (antlers, the defining  
13  
14  
15 17 characteristics of cervids), as well as males. Moreover, reindeer milk contains more  
16  
17  
18 18 protein and less lactose than bovids' milk. A high quality reference genome of this  
19  
20 19 specie will assist efforts to elucidate these and other important features in the reindeer.  
21

22 20 **Findings:** We obtained 723.2 Gb (Gigabase) of raw reads by an Illumina Hiseq 4000  
23  
24  
25 21 platform, and a 2.64 Gb final assembly, representing 95.7% of the estimated genome  
26  
27  
28 22 (2.76 Gb according to k-mer analysis), including 92.6% of expected genes according  
29  
30 23 to BUSCO analysis. The contig N50 and scaffold N50 sizes were 89.7 kilo base (kb)  
31  
32  
33 24 and 0.94 mega base (Mb), respectively. We annotated 21,555 protein-coding genes  
34  
35  
36 25 and 1.07 Gb of repetitive sequences by *de novo* and homology-based prediction.  
37  
38 26 Homology-based searches detected 159 rRNA, 547 miRNA, 1,339 snRNA and 863  
39  
40  
41 27 tRNA sequences in the genome of *R. tarandus*. The divergence time between *R.*  
42  
43 28 *tarandus*, and ancestors of *Bos taurus* and *Capra hircus*, is estimated to be 29.55  
44  
45  
46 29 million years ago (Mya).  
47

48 30 **Conclusions:** Our results provide the first high-quality reference genome for the  
49  
50  
51 31 reindeer, and a valuable resource for studying evolution, domestication and other  
52  
53  
54 32 unusual characteristics of the reindeer.  
55

56 33 **Keywords:** *Rangifer tarandus*, whole genome sequencing, assembly, annotation  
57  
58  
59  
60  
61  
62  
63  
64  
65

1  
2  
3  
4  
5 34 **Background information**  
6  
7

8 35 The Cervidae is the second largest family in the suborder Ruminantia of the  
9  
10 36 Artiodactyla, which are distributed across much of the globe in diverse habitats, from  
11  
12 37 arctic tundra to tropical forests [1, 2]. Interestingly, reindeer (*Rangifer tarandus*) is  
13  
14 38 the only species with a circumpolar distribution (present in boreal, tundra, subarctic,  
15  
16 39 arctic and mountainous regions of northern Asia, North America and Europe). It is  
17  
18 40 also the only cervid having been fully domesticated, although some other species,  
19  
20 41 such as the sika deer (*Cervus nippon*), which has been semi-domesticated for more  
21  
22 42 than 200 years and still has strong wild nature. Antlers, male secondary sexual  
23  
24 43 appendage, are the defining characteristic of cervids, which shed and regrow each  
25  
26 44 year throughout an animal's life. However, reindeer do not follow this rule, with the  
27  
28 45 exception in which females also bear shedding antlers. Moreover, reindeer milk  
29  
30 46 contains greater amount of proteins, and lower amount of lactose compared to that of  
31  
32 47 bovids [3]. Here, we report a high-quality reindeer reference genome using material  
33  
34 48 from a Chinese individual, which will be useful in elucidating special characteristics  
35  
36 49 of special cervid.  
37  
38  
39  
40  
41  
42  
43  
44  
45  
46  
47

48 50 **Data description**  
49  
50

51 51 **Animal and sample collecting**  
52  
53

54  
55  
56 52 Fresh blood was collected from a two-year-old, female reindeer of a  
57  
58 53 domesticated herd maintained by Ewenki hunter-herders in the Greater Khingan  
59  
60  
61  
62  
63  
64  
65

1  
2  
3  
4  
5 54 Mountains, Inner Mongolia Autonomous Region, China (50.77° N, 121.47° E). The  
6  
7 55 sample was immediately placed in liquid nitrogen, and was then stored at -80°C for  
8  
9  
10 56 later analysis.

## 11 12 13 14 57 **Library construction, sequencing and filtering**

15  
16  
17 58 Genomic DNA was extracted from the fresh blood. The isolated genomic DNA  
18  
19  
20 59 was then used to construct five short-insert libraries (200, 250, 350, 400 and 450 base  
21  
22 60 pair, bp) and four long-insert libraries (3, 6.5, 11.5 and 16 kb) following standard  
23  
24  
25 61 protocols provided by Illumina. Then, 150 bp paired-end sequencing was performed  
26  
27  
28 62 to generate 723.2 Gb raw data, using a whole genome shotgun sequencing strategy on  
29  
30  
31 63 an Illumina Hiseq 4000 platform (**Table S1**). To improve the quality of reads, we  
32  
33 64 trimmed low-quality bases from both sides of reads and removed reads with more  
34  
35 65 than 5% of uncalled (“N”) bases. Then reads of all libraries were corrected by  
36  
37  
38 66 SOAPec (version 2.03) [4]. Finally, clean reads amounting to 615 Gb were obtained  
39  
40  
41 67 for genome assembly.

## 42 43 44 68 **Evaluation of genome size**

45  
46  
47  
48 69 The estimated genome size is 2.76 Gb according to k-mer analysis, based on the  
49  
50  
51 70 following formula:  $G = \text{k-mer\_number} / \text{k-mer\_depth}$  (**Figure S1**) [5]. All the clean  
52  
53 71 reads provide approximately ~ 220-fold mean coverage.

## 54 55 56 57 72 **Genome assembly**

1  
2  
3  
4  
5 73 We used SOAPdenovo (version 2.04) with optimized parameters (pregraph -K  
6  
7 74 79 -d 0; map -k 79; scaff -L 200) to construct contigs and original scaffolds [5]. All  
8  
9  
10 75 reads were aligned onto contigs for scaffold construction by utilizing the paired-end  
11  
12 76 information. Gaps were filled using reads from three libraries (200, 250 and 350 bp)  
13  
14  
15 77 with GapCloser (version 1.12) [6]. The final reindeer genome assembly is 2.64 Gb  
16  
17 78 long, including 95.7 Mb (3.6%) of unknown bases, smaller than that of the domestic  
18  
19  
20 79 goat (*Capra hircus*, 2.92 Gb) [7], and similar to that of sheep (*Ovis aries*, 2.61 Gb) [8].  
21  
22  
23 80 The contig N50 (> 200 bp) and scaffold N50 (> 500 bp) sizes are 89.7 kb and 0.94 Mb,  
24  
25 81 respectively (**Table 1**).

## 82 **Quality assessments of the assembled genome**

83 We used BUSCO (benchmarking universal single-copy orthologs, version 2.0)  
84 software to assess the genome completeness [9]. Our assembly covered 92.6% of the  
85 core genes, with 3,803 genes being complete (**Table S2**). Feature-response curve  
86 (FRC, version 1.3.1) method [10] was then used to evaluate the trade-off between the  
87 assembly's contiguity and correctness. The results indicate that it has similar  
88 accumulated curve compare to published high quality assemblies for ruminant  
89 genomes including cattle, goat, and sheep (**Figure S2**). Subsequently, synteny  
90 analysis was applied to identify differences between the assembled genome and the  
91 domestic goat (*Capra hircus*) genome (**Figure S3**). 83.95% of two genome sequences  
92 could be 1:1 aligned, the average nuclear distance (percentage of different base pairs  
93 in the syntenic regions) was 7.18% (**Figure S4**). In addition, the density of different



1  
2  
3  
4  
5 94 types of break points (edges of structural variation) are about 69.88 per Mb (**Table**  
6  
7 **S3**). These results suggest that the reindeer genome assembly is of good level of  
8  
9  
10 96 contiguity and correctness.

### 13 97 **Genome annotation**

16  
17 98 To annotate the reindeer genome we initially used LTR\_FINDER [11] and  
18  
19  
20 99 RepeatModeller (version 1.0.4; <http://www.repeatmasker.org/RepeatModeler.html>) to  
21  
22 100 find repeats. Next, RepeatMasker (version 4.0.5) [12] was used (with -nolow -no\_is  
23  
24  
25 101 -norna -parallel 1 parameters) to search for known and novel transposable elements  
26  
27 102 (TE) by mapping sequences against the *de novo* repeat library and Repbase TE library  
28  
29  
30 103 (version 16.02) [13]. Subsequently, tandem repeats were annotated using Tandem  
31  
32 104 Repeat Finder (version 4.07b; with 2 7 7 80 10 50 2000 -d -h parameters) [14]. In  
33  
34  
35 105 addition, we used RepeatProteinMask software [12] with -no LowSimple -p value  
36  
37 106 0.0001 parameters to identify TE-relevant proteins. The combined results indicate that  
38  
39  
40 107 repeat sequences cover about 1.07 Gb, accounting for 40.4% of the reindeer genome  
41  
42  
43 108 assembly (**Table S4**).

44  
45  
46  
47 109 The rest of the reindeer genome assembly was annotated using both *de novo* and  
48  
49  
50 110 homology-based gene prediction approaches. For *de novo* gene prediction, we utilized  
51  
52 111 SNAP (version 2006-07-28), GenScan [15], glimmerHMM and Augustus (version  
53  
54  
55 112 2.5.5) [16] to analyze the repeat-masked genome. For homology-based predictions,  
56  
57 113 sequences encoding homologous proteins of *Bos taurus* (Ensemble 87 release), *Ovis*  
58  
59  
60 114 *aries* (Ensemble 87 release) and *Homo sapiens* (Ensemble 87 release), were aligned to

1  
2  
3  
4  
5 115 the reindeer genome using TblastN (version 2.2.26) with an (E)-value cutoff of 1 e-5.  
6  
7 116 Genewise (version wise2.2.0) [17] was then used to annotate structures of the genes.  
8  
9  
10 117 The *de novo* and homology gene sets were merged to form a comprehensive,  
11  
12 118 non-redundant gene set using EVidenceModeler software (EVM, version 1.1.1),  
13  
14  
15 119 which resulted in 21,555 protein-coding genes (**Table S5**). We then compared the  
16  
17 120 reindeer genome with species which used in homology prediction, and there is no  
18  
19  
20 121 significant difference among the four species in gene length and exon length  
21  
22 122 distribution (**Figure S5**).

23  
24  
25  
26 123 Next, we searched the KEGG, TrEMBL and SwissProt databases for best  
27  
28 124 matches to the protein sequences yielded by EVM software, using BLASTP (version  
29  
30 125 2.2.26) with an (E)-value cutoff of 1 e-5, and searched Pfam, PRINTS, ProDom and  
31  
32 126 SMART databases for known motifs and domains in our sequences using  
33  
34  
35 127 InterProScan software (version 5.18-57.0). At least one function was assigned to  
36  
37 128 19,004 (88.17%) of the detected reindeer genes through these procedures (**Table S6**).  
38  
39 129 The reads from short-insert length libraries then were mapped to the reindeer genome  
40  
41 130 with BWA (version 0.7.12-r1039) [18], then called single nucleotide variant (SNV)  
42  
43 131 by SAMtools (version 1.3.1) [19]. Finally, we performed SnpEff (version 4.30) [20]  
44  
45 132 to identify the distribution of SNV in the reindeer genome (**Table S7**).  
46  
47  
48  
49  
50  
51  
52

53 133 In addition, we predicted rRNA-coding sequences based on homology with  
54  
55 134 human rRNAs using BLASTN with default parameters. To annotate miRNA and  
56  
57 135 snRNA genes we searched the Rfam database (release 9.1) with Infernal (version  
58  
59  
60  
61  
62  
63  
64  
65

1  
2  
3  
4  
5 136 0.81), and annotated tRNAs using tRNAscan-SE (version 1.3.1) software with default  
6  
7 137 parameters. The final results identified 159 rRNAs, 547 miRNAs, 1,339 snRNAs and  
8  
9 138 863 tRNAs (**Table S8**).

10  
11  
12  
13  
14 139 **Species-specific genes and phylogenetic relationship**

15  
16  
17 140 We clustered the detected reindeer genes in families by using OrthoMCL [21]  
18  
19 141 with an (E)-value cutoff of  $1 \times 10^{-5}$ , and a Markov Chain Clustering with default  
20  
21 142 inflation parameter in an all-to-all BLASTP analysis of entries for five species (*Homo*  
22  
23 143 *sapiens*, *Equus caballus*, *Capra hircus*, *Bos taurus*, and *Rangifer tarandus*). The  
24  
25 144 result showed that 335 gene families were specific to the reindeer (**Figure S6**).  
26  
27 145 Moreover, we identified 7,505 single-copy gene families from these species and  
28  
29 146 aligned coding sequences in the families using PRANK (version 3.8.31) [22].  
30  
31 147 Subsequently, 4D-sites (four-fold degenerated sites) were extracted to construct a  
32  
33 148 phylogenetic tree by RAxML (version 7.2.8) [23] with GTR+G+I model. Finally,  
34  
35 149 phylogenetic analysis using PAML MCMCtree (version 4.5) [24], calibrated with  
36  
37 150 published timings of the divergence of the reference species  
38  
39 151 (<http://www.timetree.org/>), indicated that *Rangifer tarandus*, *Bos taurus* and *Capra*  
40  
41 152 *hircus* diverged from a common ancestor approximately 29.6 (25.4-31.7) Mya  
42  
43 153 (**Figure S7**).

44  
45  
46  
47  
48  
49  
50  
51 154 **Conclusion**

52  
53  
54  
55  
56  
57  
58 155 In summary, we report the first sequencing, assembly and annotation of the  
59  
60  
61  
62  
63  
64  
65

1  
2  
3  
4  
5 156 reindeer genome, which will be useful in analysis of the genetic basis of the unique  
6  
7 157 characteristics of reindeer, and broader studies on ruminants.  
8  
9

10  
11 158 **Availability of supporting data**  
12  
13

14  
15 159 The raw data have been deposited in Genome Sequence Archive (GSA), under  
16  
17 160 BIG Data Center, Beijing Institute Genomics (BIG), Chinese Academy of Science,  
18  
19  
20 161 with the project accession PRJCA000451.  
21  
22

23  
24 162 **Abbreviations**  
25  
26

27 163 Gb: giga base; bp: base pair; kb: kilo base; Mb: mega base; TE: transposable  
28  
29 164 element; EVM: EVIDENCEModeler; BUSCO: benchmarking universal single-copy  
30  
31  
32 165 orthologs; FRC: feature-response curves; SNV: single nucleotide variant; Mya:  
33  
34  
35 166 million years ago  
36  
37

38  
39 167 **Acknowledgements**  
40  
41

42 168 This work was supported by the he Natural Science Foundation of China (No.  
43  
44 169 31501984) and Central Public-interest Scientific Institution Basal Research Fund (No.  
45  
46 170 1610342016026) to ZPL, and Talents Team Construction Fund of Northwestern  
47  
48 171 Polytechnical University (NWPU) to QQ and WW. Special thanks to Nowbio Biotech  
49  
50  
51 172 Inc., Kunming, China for its remarkable work on DNA libraries constructions and  
52  
53  
54 173 sequencing.  
55  
56  
57

58  
59 174 **Competing interests**  
60  
61

1  
2  
3  
4  
5  
6  
7  
8  
9  
10  
11  
12  
13  
14  
15  
16  
17  
18  
19  
20  
21  
22  
23  
24  
25  
26  
27  
28  
29  
30  
31  
32  
33  
34  
35  
36  
37  
38  
39  
40  
41  
42  
43  
44  
45  
46  
47  
48  
49  
50  
51  
52  
53  
54  
55  
56  
57  
58  
59  
60  
61  
62  
63  
64  
65

175           The authors declare that they have no competing interests.

176    **Authors' contributions**

177           ZPL collected the samples; ZSL, CL ZPL, YZ, KW and HB analyzed the data;

178    ZSL, QQ and ZPL wrote the manuscript; GL, ZL, QQ and WW conceived the study.

179

1  
2  
3  
4 **References**

- 5 181 1. Fernández MH and Vrba ES. A complete estimate of the phylogenetic  
6 182 relationships in ruminantia: a dated species-level supertree of the extant  
7 183 ruminants. *Biological Reviews*. 2005;80 2:269-302.
- 9 184 2. Hassanin A, Delsuc F, Ropiquet A, Hammer C, Jansen van Vuuren B, Matthee  
10 185 C, et al. Pattern and timing of diversification of Cetartiodactyla (*Mammalia*,  
11 186 *Laurasiatheria*), as revealed by a comprehensive analysis of mitochondrial  
12 187 genomes. *C R Biol*. 2012;335 1:32-50.
- 14 188 3. Young W. Park GFWH. *Handbook of milk of non-bovine mammals*.  
15 189 Wiley-Blackwell; 2006.
- 17 190 4. Luo R, Liu B, Xie Y, Li Z, Huang W, Yuan J, et al. SOAPdenovo2: an  
18 191 empirically improved memory-efficient short-read de novo assembler.  
19 192 *GigaScience*. 2012;1 1:1-6.
- 21 193 5. Li R, Fan W, Tian G, Zhu H, He L, Cai J, et al. The sequence and de novo  
22 194 assembly of the giant panda genome. *Nature*. 2010;463 7279:311-7.
- 24 195 6. Li R, Zhu H, Ruan J, Qian W, Fang X, Shi Z, et al. De novo assembly of  
25 196 human genomes with massively parallel short read sequencing. *Genome Res*.  
26 197 2010;20 2:265-72.
- 28 198 7. Bickhart DM, Rosen BD, Koren S, Sayre BL, Hastie AR, Chan S, et al.  
29 199 Single-molecule sequencing and chromatin conformation capture enable de  
30 200 novo reference assembly of the domestic goat genome. *Nat Genet*. 2017;49  
31 201 4:643-50.
- 33 202 8. Jiang Y, Xie M, Chen W, Talbot R, Maddox JF, Faraut T, et al. The sheep  
34 203 genome illuminates biology of the rumen and lipid metabolism. *Science*.  
35 204 2014;344 6188:1168-73.
- 37 205 9. Simão FA, Waterhouse RM, Ioannidis P, Kriventseva EV and Zdobnov EM.  
38 206 BUSCO: assessing genome assembly and annotation completeness with  
39 207 single-copy orthologs. *Bioinformatics*. 2015;31 19:3210-2.
- 41 208 10. Vezzi F, Narzisi G and Mishra B. Reevaluating assembly evaluations with  
42 209 feature response curves: GAGE and assemblathons. *PLoS ONE*. 2012;7  
43 210 12:e52210.
- 45 211 11. Xu Z and Wang H. LTR\_FINDER: an efficient tool for the prediction of  
46 212 full-length LTR retrotransposons. *Nucleic Acids Res*. 2007;35  
47 213 suppl\_2:W265-W8.
- 49 214 12. Tarailo-Graovac M and Chen N. Using RepeatMasker to identify repetitive  
50 215 elements in genomic sequences. *Current Protocols in Bioinformatics*. John  
51 216 Wiley & Sons, Inc.; 2009.
- 53 217 13. Jurka J, Kapitonov VV, Pavlicek A, Klonowski P, Kohany O and  
54 218 Walichiewicz J. Repbase update, a database of eukaryotic repetitive elements.  
55 219 *Cytogenet Genome Res*. 2005;110 1-4:462-7.
- 57 220 14. Benson G. Tandem repeats finder: a program to analyze DNA sequences.  
58 221 *Nucleic Acids Res*. 1999;27 2:573-80.
- 59 222 15. Burge C and Karlin S. Prediction of complete gene structures in human  
60 223 genomic DNA1. *J Mol Biol*. 1997;268 1:78-94.

1  
2  
3  
4  
5  
6  
7  
8  
9  
10  
11  
12  
13  
14  
15  
16  
17  
18  
19  
20  
21  
22  
23  
24  
25  
26  
27  
28  
29  
30  
31  
32  
33  
34  
35  
36  
37  
38  
39  
40  
41  
42  
43  
44  
45  
46  
47  
48  
49  
50  
51  
52  
53  
54  
55  
56  
57  
58  
59  
60  
61  
62  
63  
64  
65

224 16. Stanke M, Keller O, Gunduz I, Hayes A, Waack S and Morgenstern B.  
225 AUGUSTUS: ab initio prediction of alternative transcripts. *Nucleic Acids Res.*  
226 2006;34 suppl\_2:W435-W9.

227 17. Birney E, Clamp M and Durbin R. GeneWise and Genomewise. *Genome Res.*  
228 2004;14 5:988-95.

229 18. Heng L. Aligning sequence reads, clone sequences and assembly contigs with  
230 BWA-MEM. *arXiv.* 2013;1303.3997

231 19. Li H, Handsaker B, Wysoker A, Fennell T, Ruan J, Homer N, et al. The  
232 sequence alignment/map format and SAMtools. *Bioinformatics.* 2009;25  
233 16:2078-9.

234 20. Cingolani P, Platts A, Wang LL, Coon M, Nguyen T, Wang L, et al. A  
235 program for annotating and predicting the effects of single nucleotide  
236 polymorphisms, SnpEff: SNPs in the genome of *Drosophila melanogaster*  
237 strain w(1118); iso-2; iso-3. *Fly (Austin).* 2012;6 2:80-92.

238 21. Li L, Stoeckert CJ and Roos DS. OrthoMCL: Identification of Ortholog  
239 Groups for Eukaryotic Genomes. *Genome Res.* 2003;13 9:2178-89.

240 22. Löytynoja A and Goldman N. An algorithm for progressive multiple  
241 alignment of sequences with insertions. *Proc Natl Acad Sci U S A.* 2005;102  
242 30:10557-62.

243 23. Stamatakis A. RAxML version 8: a tool for phylogenetic analysis and  
244 post-analysis of large phylogenies. *Bioinformatics.* 2014;30 9:1312-3.

245 24. Yang Z. PAML 4: Phylogenetic Analysis by Maximum Likelihood. *Mol Biol*  
246 *Evol.* 2007;24 8:1586-91.

1  
2  
3  
4  
5  
6  
7  
8  
9  
10  
11  
12  
13  
14  
15  
16  
17  
18  
19  
20  
21  
22  
23  
24  
25  
26  
27  
28  
29  
30  
31  
32  
33  
34  
35  
36  
37  
38  
39  
40  
41  
42  
43  
44  
45  
46  
47  
48  
49  
50  
51  
52  
53  
54  
55  
56  
57  
58  
59  
60  
61  
62  
63  
64  
65

**Tables**

247 **Table 1 Summary of the genome assembly of *Rangier tarandus***

---

| Type          | Scaffold (bp) | Contig (bp)   |
|---------------|---------------|---------------|
| Total number  | 58,765        | 117,102       |
| Total length  | 2,832,785,815 | 2,732,476,387 |
| N50 length    | 986,392       | 91,805        |
| N90 length    | 151,297       | 17,480        |
| Max length    | 4,664,725     | 770,474       |
| GC content(%) | 41.24         | 40.98         |

---



1  
2  
3  
4  
5  
6  
7  
8  
9  
10  
11  
12  
13  
14  
15  
16  
17  
18  
19  
20  
21  
22  
23  
24  
25  
26  
27  
28  
29  
30  
31  
32  
33  
34  
35  
36  
37  
38  
39  
40  
41  
42  
43  
44  
45  
46  
47  
48  
49  
50  
51  
52  
53  
54  
55  
56  
57  
58  
59  
60  
61  
62  
63  
64  
65

**Figure legends**

248 **Figure 1. Phylogenetic relationships of *Rangier tarandus* and four species based**  
249 **on four-fold degenerated sites.** Estimated divergence times are shown above the  
250 nodes. MYA, million years ago.

1  
2  
3  
4  
5  
6  
7  
8  
9  
10  
11  
12  
13  
14  
15  
16  
17  
18  
19  
20  
21  
22  
23  
24  
25  
26  
27  
28  
29  
30  
31  
32  
33  
34  
35  
36  
37  
38  
39  
40  
41  
42  
43  
44  
45  
46  
47  
48  
49  
50  
51  
52  
53  
54  
55  
56  
57  
58  
59  
60  
61  
62  
63  
64  
65

1  
2  
3  
4  
5  
6  
7  
8  
9  
10  
11  
12  
13  
14  
15  
16  
17  
18  
19  
20  
21  
22  
23  
24  
25  
26  
27  
28  
29  
30  
31  
32  
33  
34  
35  
36  
37  
38  
39  
40  
41  
42  
43  
44  
45  
46  
47  
48  
49  
50  
51  
52  
53  
54  
55  
56  
57  
58  
59  
60  
61  
62  
63  
64  
65

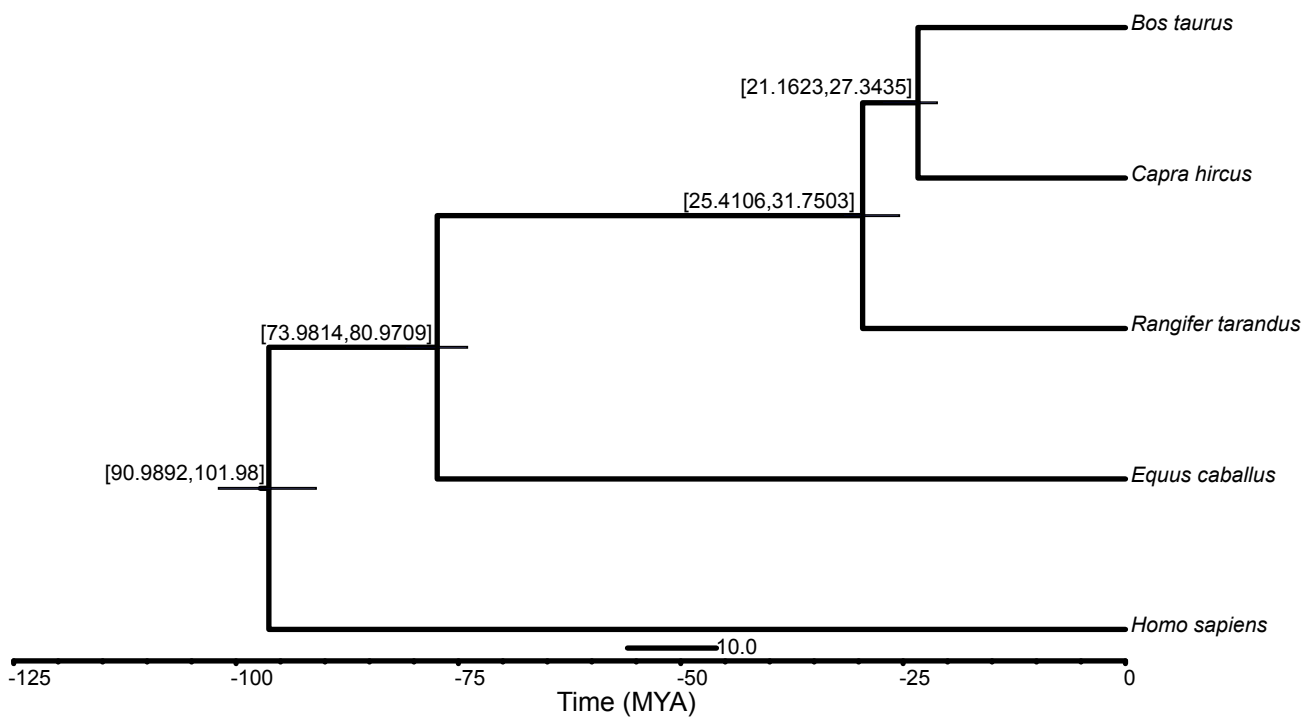

**Figure 1.** Phylogenetic relationships of *Rangier tarandus* and four species based on four-fold degenerated sites. Estimated divergence times are shown above the nodes. MYA, million years ago.

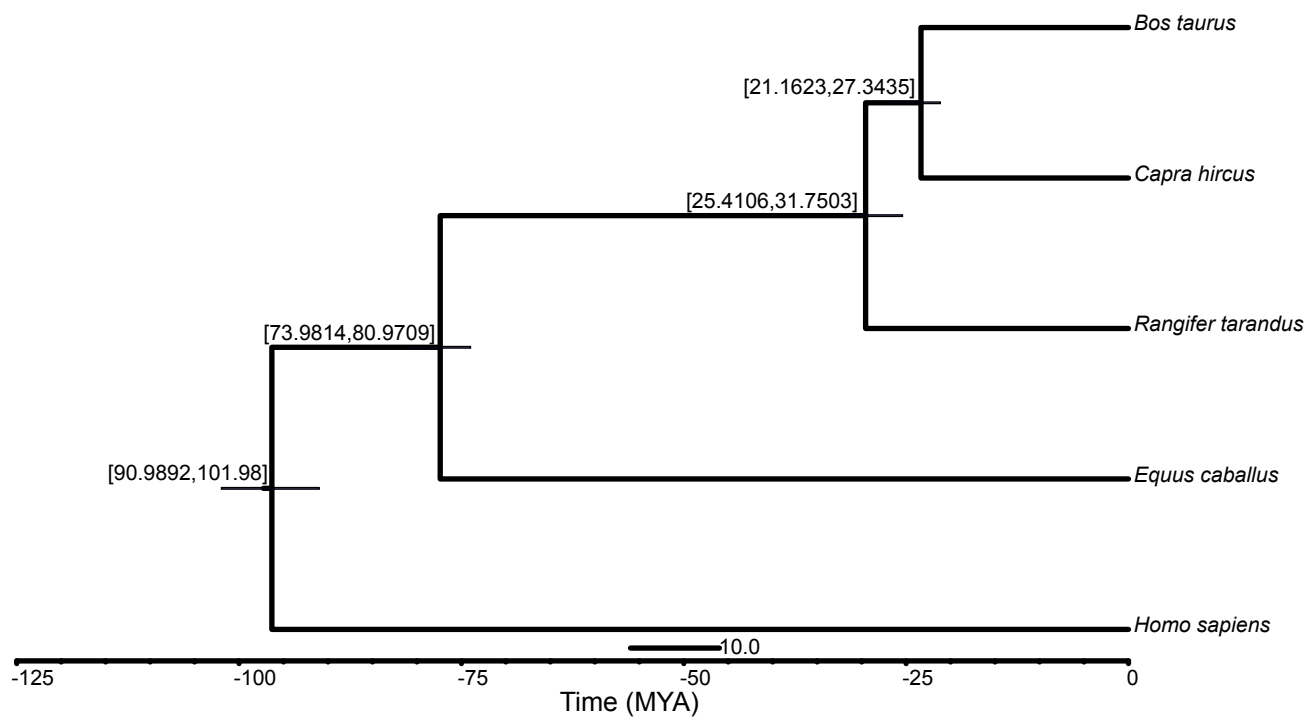

**Figure 1.** Phylogenetic relationships of *Rangifer tarandus* and four species based on four-fold degenerated sites. Estimated divergence times are shown above the nodes. MYA, million years ago.



Click here to access/download  
**Supplementary Material**  
Figure\_S1.pdf



Click here to access/download  
**Supplementary Material**  
Figure\_S2.pdf



Click here to access/download  
**Supplementary Material**  
Figure\_S3V5.jpg



Click here to access/download  
**Supplementary Material**  
Figure\_S4.pdf





Click here to access/download  
**Supplementary Material**  
Figure\_S5.pdf



Click here to access/download  
**Supplementary Material**  
Figure\_S6.pdf



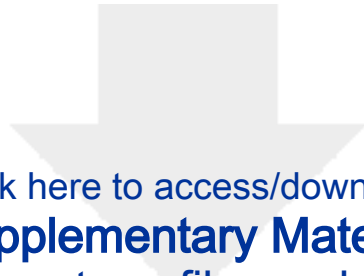

Click here to access/download  
**Supplementary Material**  
Supplementary\_files\_submit.docx

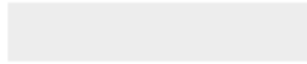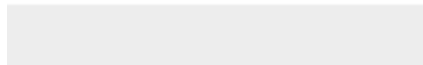

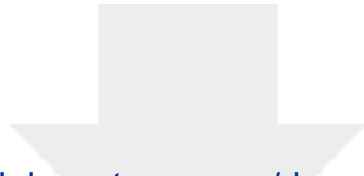

Click here to access/download  
**Supplementary Material**  
Reindeer-MS-6-23\_submit.doc



Supplement: gix102_giga-d-17-00152_original-submission.pdf [file gix102_giga-d-17-00152_original-submission.pdf]
