# Supplementary material for: Draft genome of the reindeer (Rangifer tarandus)
Source: PubMed Central journal article supplement (PMC5726476; doi:10.1093/gigascience/gix102), 2017-11-01

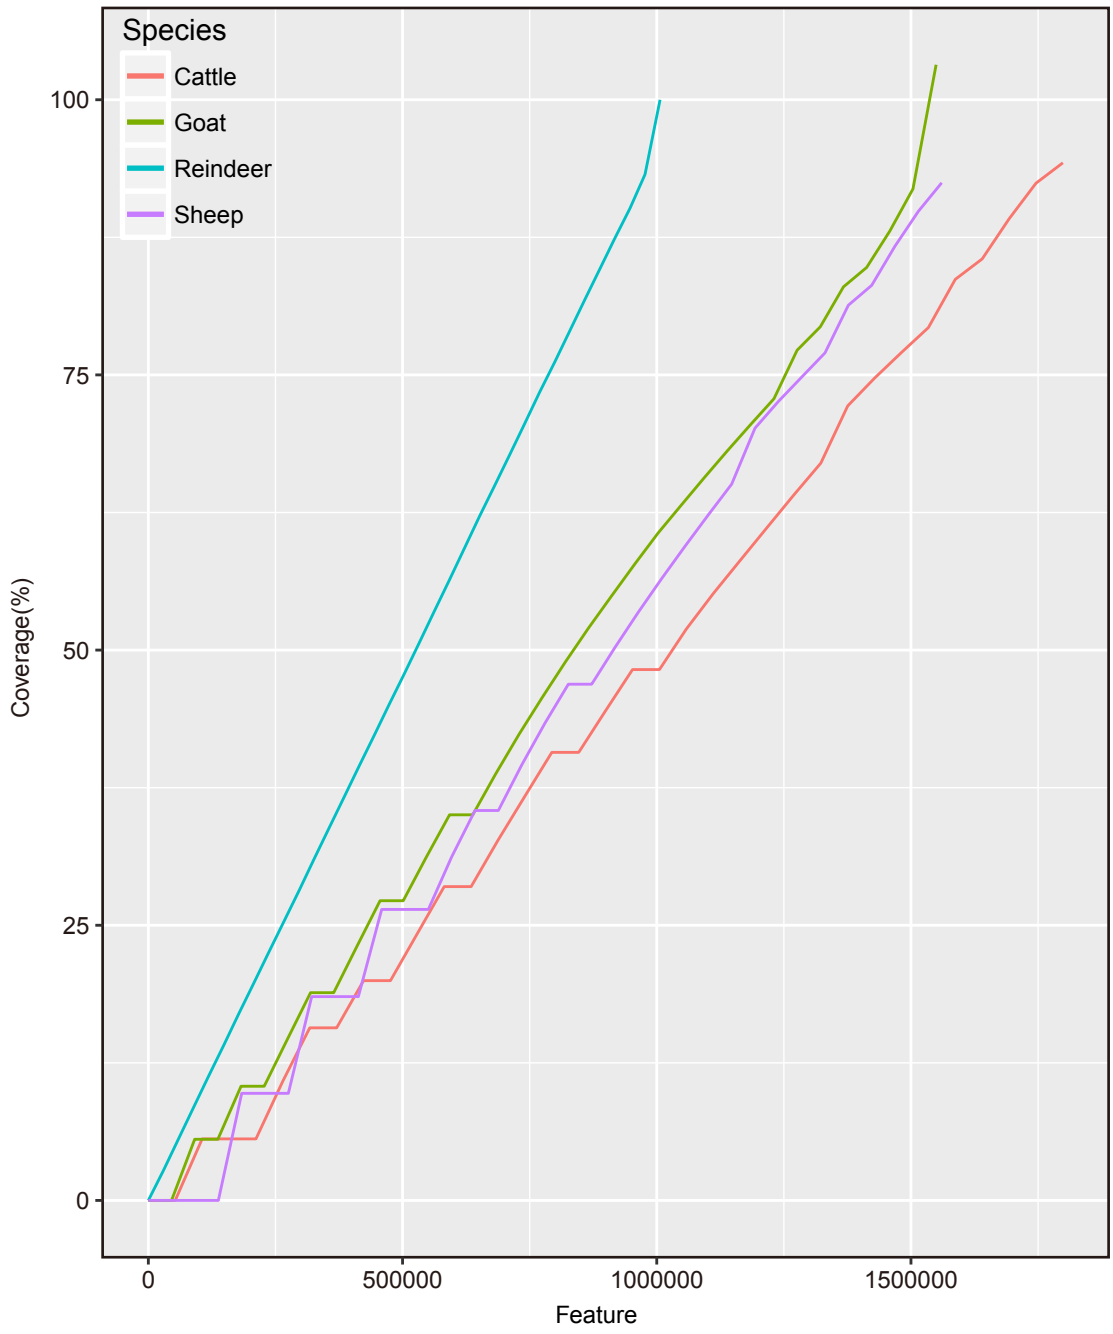

Supplement: gix102_figure_s2.pdf [file gix102_figure_s2.pdf]
