# Supplementary material for: Draft genome of the reindeer (Rangifer tarandus)
Source: PubMed Central journal article supplement (PMC5726476; doi:10.1093/gigascience/gix102), 2017-11-01
Supplement: gix102_figure_s3.pdf [file gix102_figure_s3.pdf]

Scaffolds of *Rangier tarandus* genome

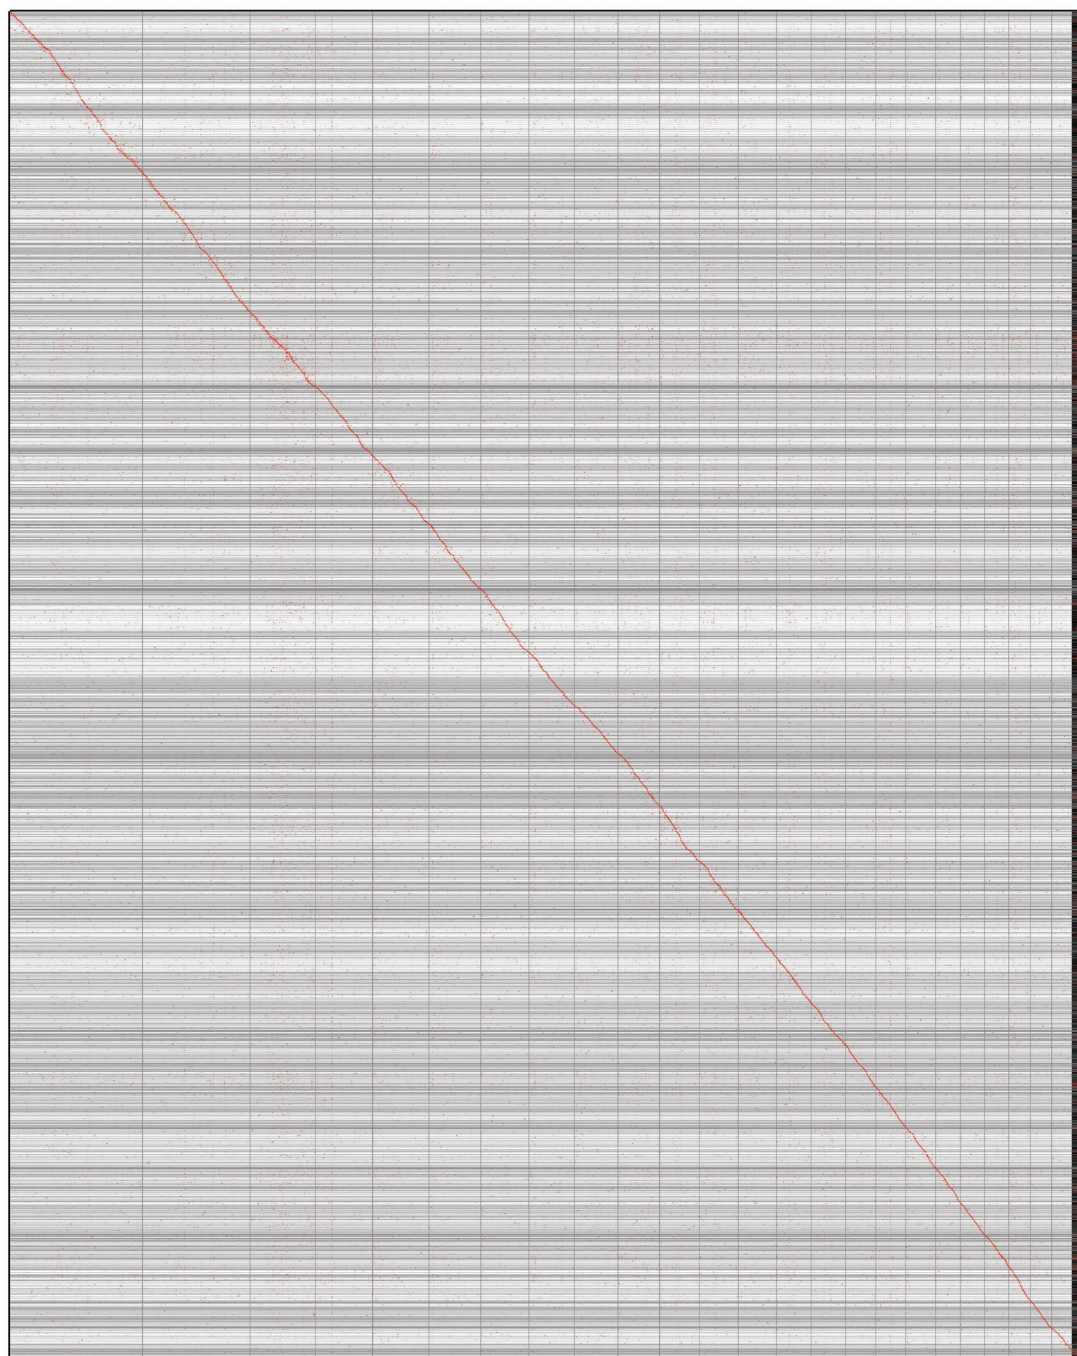

1 2 3 4 5 6 7 8 9 10 11 12 13 14 15 16 17 18 19 20 21 22 23 24

Chromosomes of *Capra hircus* genome
